# Supplementary material for: Beton a prise rapide : de 3 jours a 12 heures?
Source: eLife journal article supplement (doi:10.7554/elife.89002), 2005-09-01
Supplement: fig1-figsupp1-data2 [file elife-89002-fig1-figsupp1-data2-v1.pdf]

**a**

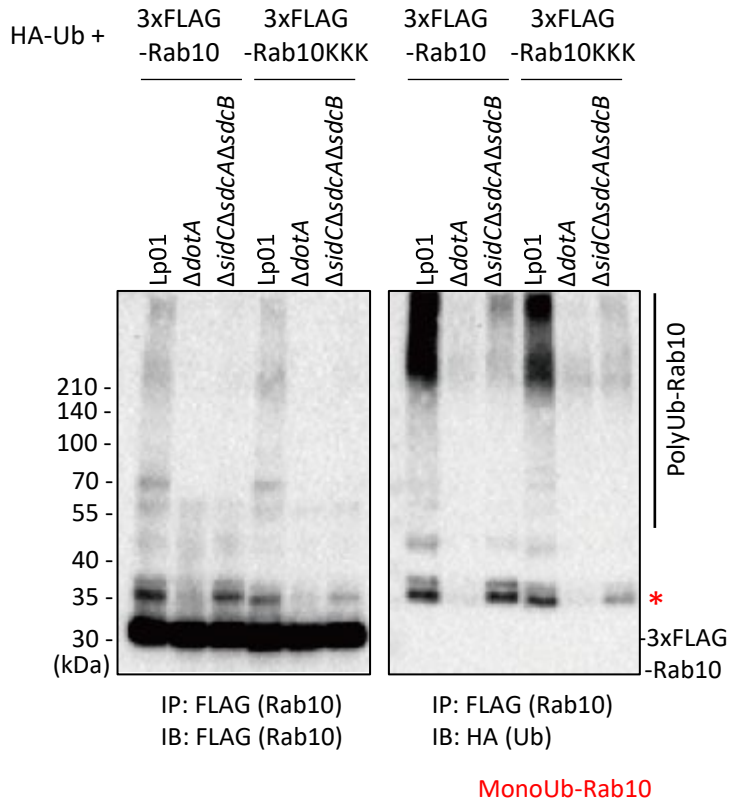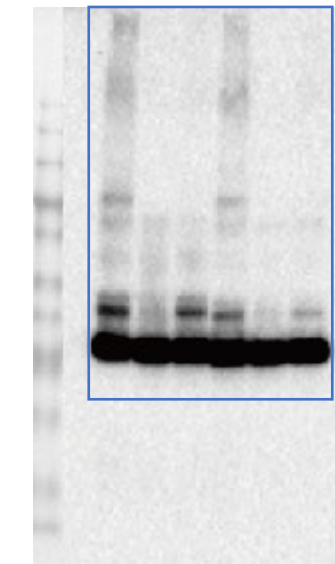

**Figure 1**  
– figure supplement 1a  
left

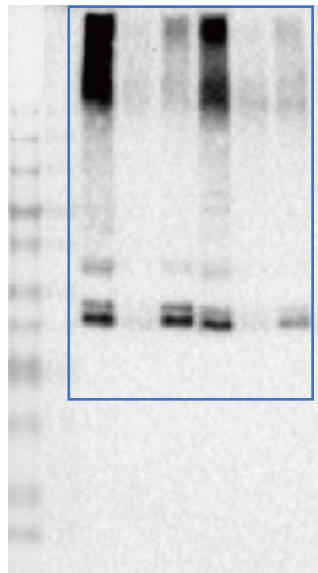

**Figure 1**  
– figure supplement 1a  
right
