# Supplementary material for: Beton a prise rapide : de 3 jours a 12 heures?
Source: eLife journal article supplement (doi:10.7554/elife.89002), 2005-09-01

**b**

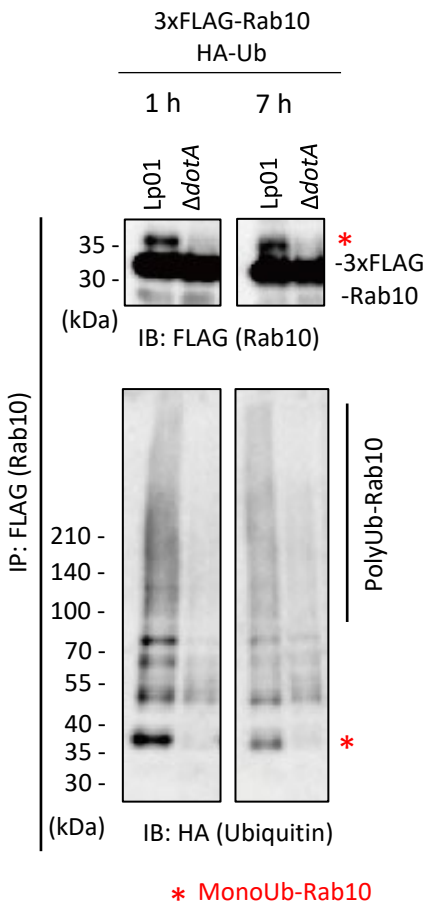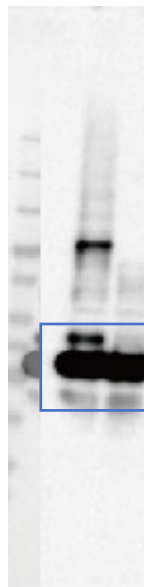

**Figure 1**  
– figure supplement 1b  
top

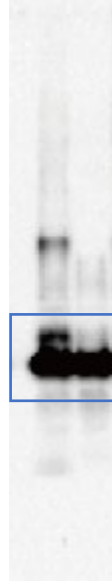

**Figure 1**  
– figure supplement 1b  
bottom

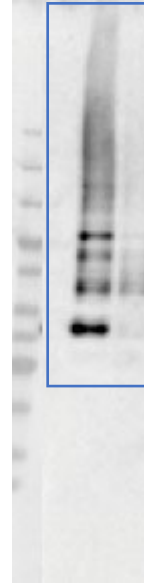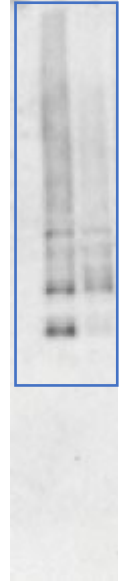

Supplement: fig1-figsupp1-data4 [file elife-89002-fig1-figsupp1-data4-v1.pdf]
