# Supplementary material for: Multi-tiered actions of Legionella effectors to modulate host Rab10 dynamics
Source: eLife journal article supplement (doi:10.7554/elife.89002), 2023-08-08
Supplement: fig2-data2 [file Figure 2b 1h 4h 201120.xls]

## Sheet: Sheet2
1hr
		Rab10-negative	Rab10-positive	Rab10-positive LCV (%)			Rab10-negative	Rab10-positive	Rab10-positive LCV (%)			Rab10-negative	Rab10-positive	Rab10-positive LCV (%)
	Lp01	127	91	41.7431			115	92	44.4444			127	81	38.9423
	ΔdotA	186	20	9.70874			184	16	8			188	23	10.9005
	ΔsidC ΔsdcA	174	32	15.534			158	58	26.8519			180	36	16.6667
	ΔsidC ΔsdcAΔsdcB	144	67	31.7536			157	50	24.1546			176	34	16.1905
	ΔsidEs	177	42	19.1781			175	40	18.6047			182	23	11.2195
	ΔsidEs ΔsidC ΔsdcA	177	33	15.7143			183	28	13.2701			188	24	11.3208
		Rab10-positive LCV (%)
	Lp01	41.71	2.24636
	ΔdotA	9.5364	1.19037
	ΔsidCΔsdcA	19.6842	5.08937
	ΔsidCΔsdcAΔsdcB	24.0329	6.35418
	ΔsidEs	16.3341	3.62412
	ΔsidEs ΔsidC ΔsdcA	13.4351	1.79744
					F-test	T-test
	Lp01	41.7431	44.4444	38.9423	0.21924	2.86393e-05
	ΔdotA	9.70874	8	10.9005
	ΔsidC ΔsdcA	15.534	26.8519	16.6667	0.163053	0.00249725
	ΔsidC ΔsdcAΔsdcB	31.7536	24.1546	16.1905	0.22219	0.0103332	0.781615	0.246018
	ΔsidEs	19.1781	18.6047	11.2195	0.55512	0.000545477
	ΔsidEs ΔsidC ΔsdcA	15.7143	13.2701	11.3208
4hr
		Rab10-negative	Rab10-positive	Rab10-positive LCV (%)			Rab10-negative	Rab10-positive	Rab10-positive LCV (%)			Rab10-negative	Rab10-positive	Rab10-positive LCV (%)
	Lp01	113	96	45.933			120	86	41.7476			124	87	41.2322
	ΔdotA	192	15	7.24638			195	17	8.01887			196	18	8.41121
	ΔsidC ΔsdcA	140	64	31.3725			127	82	39.2344			124	78	38.6139
	ΔsidC ΔsdcAΔsdcB	172	29	14.4279			164	42	20.3883			168	38	18.4466
	ΔsidEs	184	30	14.0187			191	12	5.91133			182	19	9.45274
	ΔsidEs ΔsidC ΔsdcA	192	28	12.7273			173	31	15.1961			182	21	10.3448
		Rab10-positive LCV (%)
	Lp01	42.9709	2.10504
	ΔdotA	7.89215	0.483911
	ΔsidCΔsdcA	36.407	3.56887
	ΔsidCΔsdcAΔsdcB	17.7543	2.48212
	ΔsidEs	9.79425	3.31861
	ΔsidEs ΔsidC ΔsdcA	12.7561	1.98062
					F-test	T-test
	Lp01	45.933	41.7476	41.2322	0.050193	1.06461e-05
	ΔdotA	7.24638	8.01887	8.41121
	ΔsidC ΔsdcA	31.3725	39.2344	38.6139	0.258109	0.0442921
	ΔsidC ΔsdcAΔsdcB	14.4279	20.3883	18.4466	0.8367	0.000197033	0.652026	0.00186255
	ΔsidEs	14.0187	5.91133	9.45274	0.573827	0.000141003
	ΔsidEs ΔsidC ΔsdcA	12.7273	15.1961	10.3448
