# Supplementary material for: Multi-tiered actions of Legionella effectors to modulate host Rab10 dynamics
Source: eLife journal article supplement (doi:10.7554/elife.89002), 2023-08-08
Supplement: fig2-data2 [file Figure 2b 7h 210208.xls]

## Sheet: Sheet2
		Rab10-negative	Rab10-positive	Rab10-positive LCV (%)			Rab10-negative	Rab10-positive	Rab10-positive LCV (%)			Rab10-negative	Rab10-positive	Rab10-positive LCV (%)
	Lp01	142	61	30.0493			109	93	46.0396			126	84	40
	ΔdotA	192	15	7.24638			199	8	3.86473			190	13	6.40394
	ΔsidC ΔsdcA	131	86	39.6313			93	103	52.551			118	83	41.2935
	ΔsidC ΔsdcAΔsdcB	159	54	25.3521			159	42	20.8955			166	46	21.6981
	ΔsidEs	155	53	25.4808			158	43	21.393			162	44	21.3592
		Rab10-positive LCV (%)
	Lp01	38.6963	6.5928
	ΔdotA	5.83835	1.43731
	ΔsidCΔsdcA	44.492	5.73887
	ΔsidCΔsdcAΔsdcB	22.6486	1.93956
	ΔsidEs	22.7443	1.935
					F-test	T-test
	Lp01	30.0493	46.0396	40	0.0453728	0.0011652
	ΔdotA	7.24638	3.86473	6.40394
	ΔsidC ΔsdcA	39.6313	52.551	41.2935	0.862168	0.200739
	ΔsidC ΔsdcAΔsdcB	25.3521	20.8955	21.6981	0.159312	0.0149327	0.205027	0.00349268
	ΔsidEs	25.4808	21.393	21.3592	0.158622	0.0152026
