# Supplementary material for: Multi-tiered actions of Legionella effectors to modulate host Rab10 dynamics
Source: eLife journal article supplement (doi:10.7554/elife.89002), 2023-08-08
Supplement: fig3-data3 [file Figure 3b 3d anti-FK2 210709.xls]

## Sheet: Sheet2
	1hr	FK2-negative	FK2-positive	FK2-positive LCV (%)			FK2-negative	FK2-positive	FK2-positive LCV (%)			FK2-negative	FK2-positive	FK2-positive LCV (%)
	p3xFLAG/ΔsidCΔsdcAΔsdcB	219	0	0			204	1	0.487805			210	2	0.943396
	p3xFLAG-SdcB/ΔsidCΔsdcAΔsdcB	161	54	25.1163			159	61	27.7273			154	59	27.6995
	p3xFLAG-SdcB C57A/ΔsidCΔsdcAΔsdcB	215	2	0.921659			202	0	0			215	3	1.37615
	7hr	FK2-negative	FK2-positive	FK2-positive LCV (%)			FK2-negative	FK2-positive	FK2-positive LCV (%)			FK2-negative	FK2-positive	FK2-positive LCV (%)
	p3xFLAG/ΔsidCΔsdcAΔsdcB	199	15	7.00935			195	15	7.14286			218	12	5.21739
	p3xFLAG-SdcB/ΔsidCΔsdcAΔsdcB	59	156	72.5581			83	144	63.4361			89	129	59.1743
	p3xFLAG-SdcB C57A/ΔsidCΔsdcAΔsdcB	126	15	10.6383			212	12	5.35714			195	19	8.8785
	Ubiquitin-positive LCV (%)	1h	7h		1h (STD)	7h (STD)
	p3xFLAG/ΔsidCΔsdcAΔsdcB	0.477067	6.45653		0.47179	1.0752
	p3xFLAG-SdcB/ΔsidCΔsdcAΔsdcB	26.8477	65.0562		1.49951	6.83741
	p3xFLAG-SdcB C57A/ΔsidCΔsdcAΔsdcB	0.765935	8.29132		0.701165	2.6891
	FK2(Ub) 1hr				F-test	T-test
	p3xFLAG/ΔsidCΔsdcAΔsdcB	0	0.487805	0.943396	0.0900745	4.17605e-06
	p3xFLAG-SdcB/ΔsidCΔsdcAΔsdcB	25.1163	27.7273	27.6995
	p3xFLAG-SdcB C57A/ΔsidCΔsdcAΔsdcB	0.921659	0	1.37615	0.179417	5.36055e-06
					F-test	T-test
	FK2(Ub) 7hr
	p3xFLAG/ΔsidCΔsdcAΔsdcB	7.00935	7.14286	5.21739	0.0482633	0.00189033
	p3xFLAG-SdcB/ΔsidCΔsdcAΔsdcB	72.5581	63.4361	59.1743
	p3xFLAG-SdcB C57A/ΔsidCΔsdcAΔsdcB	10.6383	5.35714	8.8785	0.267916	9.01677e-05
