# Supplementary material for: Multi-tiered actions of Legionella effectors to modulate host Rab10 dynamics
Source: eLife journal article supplement (doi:10.7554/elife.89002), 2023-08-08
Supplement: fig3-data3 [file Figure 3b 3d anti-FLAG 210709.xls]

## Sheet: Sheet2
	1hr	FLAG-negative	FLAG-positive	FLAG-positive LCV (%)			FLAG-negative	FLAG-positive	FLAG-positive LCV (%)			FLAG-negative	FLAG-positive	FLAG-positive LCV (%)
	p3xFLAG/ΔsidCΔsdcAΔsdcB	200	0	0			200	0	0			200	0	0
	p3xFLAG-SdcB/ΔsidCΔsdcAΔsdcB	183	35	16.055			183	38	17.1946			156	43	21.608
	p3xFLAG-SdcB C57A/ΔsidCΔsdcAΔsdcB	124	86	40.9524			139	69	33.1731			149	71	32.2727
	7hr	FLAG-negative	FLAG-positive	FLAG-positive LCV (%)			FLAG-negative	FLAG-positive	FLAG-positive LCV (%)			FLAG-negative	FLAG-positive	FLAG-positive LCV (%)
	p3xFLAG/ΔsidCΔsdcAΔsdcB	204	0	0			200	0	0			200	0	0
	p3xFLAG-SdcB/ΔsidCΔsdcAΔsdcB	72	140	66.0377			70	148	67.8899			76	138	64.486
	p3xFLAG-SdcB C57A/ΔsidCΔsdcAΔsdcB	61	156	71.8894			65	147	69.3396			60	156	72.2222
	SdcB-positive LCV (%)	1h	7h		1h (STD)	7h (STD)
	p3xFLAG/ΔsidCΔsdcAΔsdcB	0	0		0	0
	p3xFLAG-SdcB/ΔsidCΔsdcAΔsdcB	18.2859	66.1379		2.93294	1.70417
	p3xFLAG-SdcB C57A/ΔsidCΔsdcAΔsdcB	35.4661	71.1504		4.77257	1.577
	Sdc 1hr				F-test	T-test
	p3xFLAG/ΔsidCΔsdcAΔsdcB	0	0	0	#DIV/0!	0.000208546
	p3xFLAG-SdcB/ΔsidCΔsdcAΔsdcB	16.055	17.1946	21.608
	p3xFLAG-SdcB C57A/ΔsidCΔsdcAΔsdcB	40.9524	33.1731	32.2727	0.274132	0.00301886
	Sdc 7hr				F-test	T-test
	p3xFLAG/ΔsidCΔsdcAΔsdcB	0	0	0	#DIV/0!	1.4672e-07
	p3xFLAG-SdcB/ΔsidCΔsdcAΔsdcB	66.0377	67.8899	64.486	0.922599	0.0100675
	p3xFLAG-SdcB C57A/ΔsidCΔsdcAΔsdcB	71.8894	69.3396	72.2222		8.03561e-08
