# Supplementary material for: Multi-tiered actions of Legionella effectors to modulate host Rab10 dynamics
Source: eLife journal article supplement (doi:10.7554/elife.89002), 2023-08-08
Supplement: fig4-data6 [file Figure 4b 231206.xls]

## Sheet: Sheet2
				Rab10-positive (%)			Rab10-negative	Rab10-positive	Rab10-positive (%)			Rab10-negative	Rab10-positive	Rab10-positive (%)
	Lp01			62					64					56
	ΔdotA			6					8					2
	ΔsidCΔsdcAΔsdcB			18					22					14
	ΔsidEs			20					22					14
		Rab10-positive (%)		FTEST	TTEST
	Lp01	60.6667	4.16333				62	64	56
	ΔdotA	5.33333	3.05505				6	8	2
	ΔsidCΔsdcAΔsdcB	18	4	0.96	0.000107353		18	22	14
	ΔsidEs	18.6667	4.16333	1	0.000123303		20	22	14
