# Supplementary material for: Multi-tiered actions of Legionella effectors to modulate host Rab10 dynamics
Source: eLife journal article supplement (doi:10.7554/elife.89002), 2023-08-08
Supplement: fig4-data6 [file Figure 4e 220421.xls]

## Sheet: Sheet2
		Rab10-negative	Rab10-positive	Rab10-positive/SdcB-positive (%)			Rab10-negative	Rab10-positive	Rab10-positive/SdcB-positive (%)			Rab10-negative	Rab10-positive	Rab10-positive/SdcB-positive (%)
	p3xFLAG-sdcB/ΔsidCs	58	69	54.3307			67	64	48.855			70	50	41.6667
	p3xFLAG-sdcB C57A/ΔsidCs	86	36	29.5082			93	31	25			100	38	27.5362
		Rab10-positive/SdcB-positive (%)				STD						TTEST	FTEST
	p3xFLAG-sdcB/ΔsidCs	48.2841				6.35129		54.3307	48.855	41.6667		0.00288618	0.22477
	p3xFLAG-sdcB C57A/ΔsidCs	27.3481				2.25998		29.5082	25	27.5362
