# Supplementary material for: Beton a prise rapide : de 3 jours a 12 heures?
Source: eLife journal article supplement (doi:10.7554/elife.89002), 2005-09-01
Supplement: fig4-figsupp1-data2 [file elife-89002-fig4-figsupp1-data2-v1.pdf]

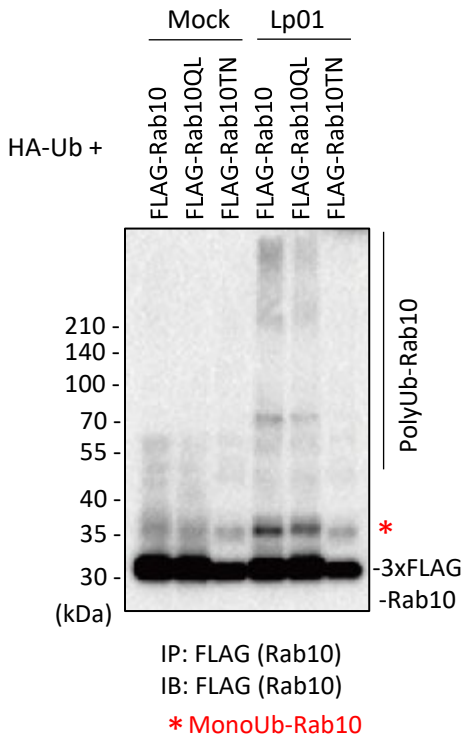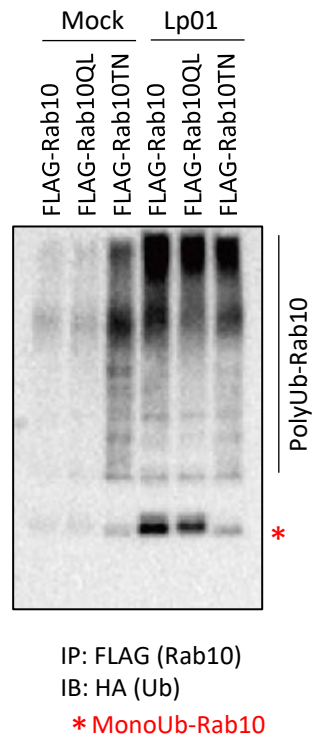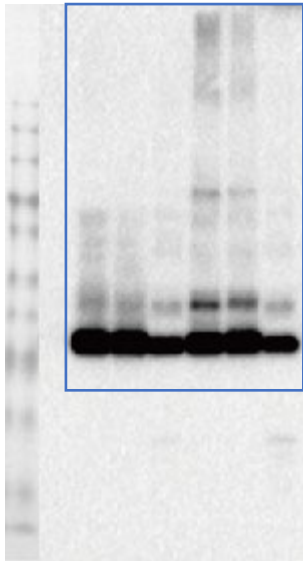

Figure 4 – figure supplement 1  
left

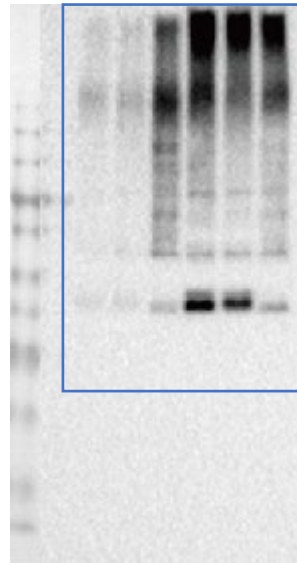

Figure 4 – figure supplement 1  
right
