# Supplementary material for: Beton a prise rapide : de 3 jours a 12 heures?
Source: eLife journal article supplement (doi:10.7554/elife.89002), 2005-09-01
Supplement: fig5-data4 [file elife-89002-fig5-data4-v1.pdf]

**b**

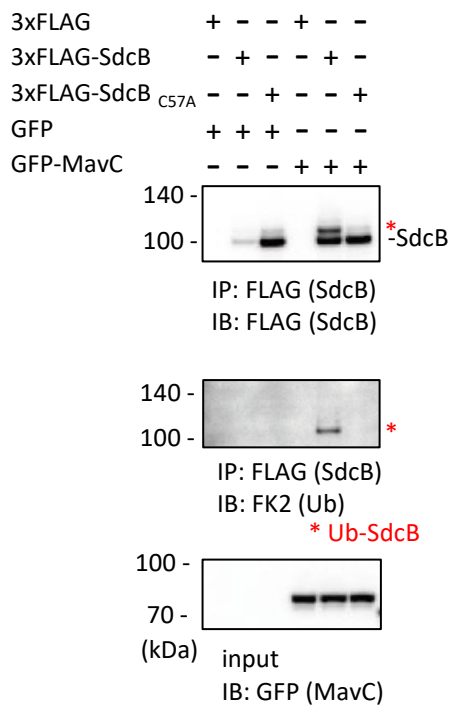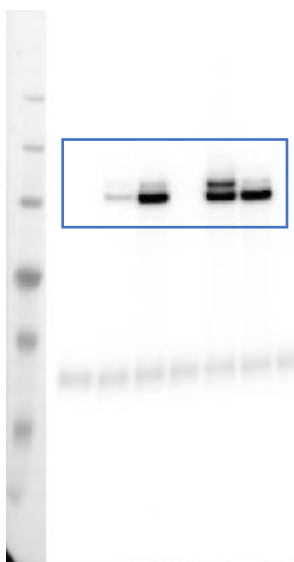

**Figure 5b  
top**

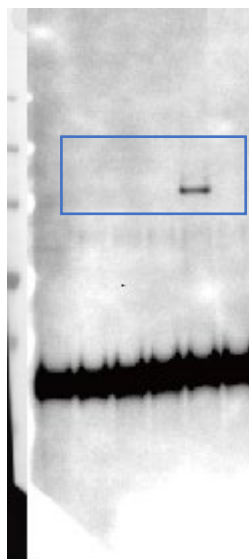

**Figure 5b  
middle**

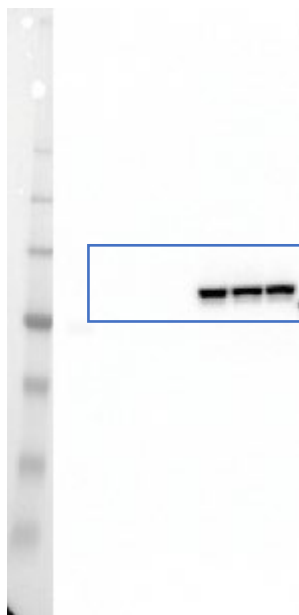

**Figure 5b  
bottom**
