# Supplementary material for: Beton a prise rapide : de 3 jours a 12 heures?
Source: eLife journal article supplement (doi:10.7554/elife.89002), 2005-09-01
Supplement: fig5-data6 [file elife-89002-fig5-data6-v1.pdf]

**C**

|          |   |   |   |   |   |   |
|----------|---|---|---|---|---|---|
| Ub       | - | + | + | + | + | + |
| His-SdcB | + | + | + | + | - | - |
| MavC     | - | - | + | - | + | - |
| MvcA     | - | - | - | + | - | + |

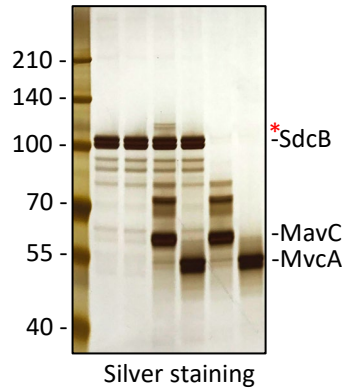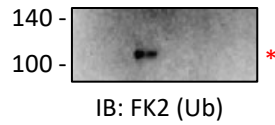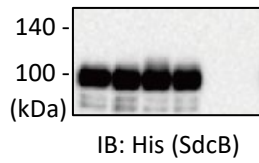

\* Ub-SdcB

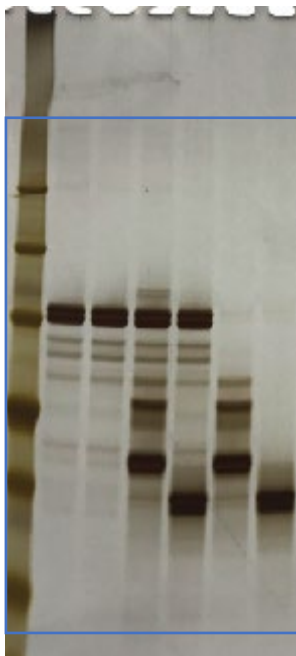

Figure 5c  
top

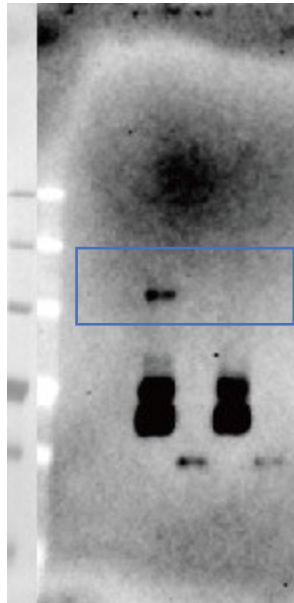

Figure 5c  
middle

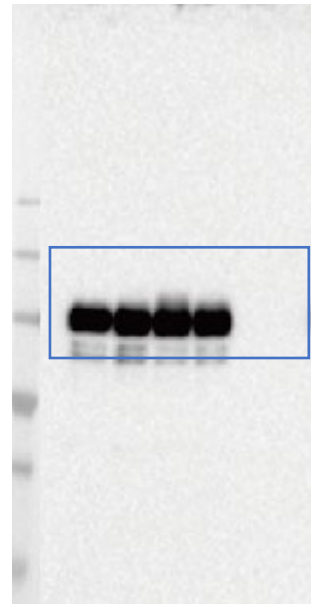

Figure 5c  
bottom
