# Supplementary material for: Beton a prise rapide : de 3 jours a 12 heures?
Source: eLife journal article supplement (doi:10.7554/elife.89002), 2005-09-01
Supplement: fig5-data8 [file elife-89002-fig5-data8-v1.pdf]

**d**

|                             |   |   |   |   |   |   |   |   |
|-----------------------------|---|---|---|---|---|---|---|---|
| HA-Ub                       | + | + | + | + | + | + | + | + |
| 3xFLAG-SdcA                 | + | - | + | - | - | - | - | - |
| 3xFLAG-SdcA <sub>C44A</sub> | - | + | - | + | - | - | - | - |
| 3xFLAG-SidC                 | - | - | - | - | + | - | + | - |
| 3xFLAG-SidC <sub>C46A</sub> | - | - | - | - | - | + | - | + |
| GFP-MavC                    | + | + | - | - | + | + | - | - |
| GFP-MavC <sub>C74A</sub>    | - | - | + | + | - | - | + | + |

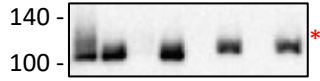

IP: FLAG  
IB: FLAG

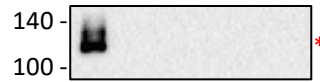

IP: FLAG  
IB: HA (Ub)

\* Ub-SdcA

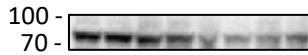

(kDa) input  
IB: GFP (MavC)

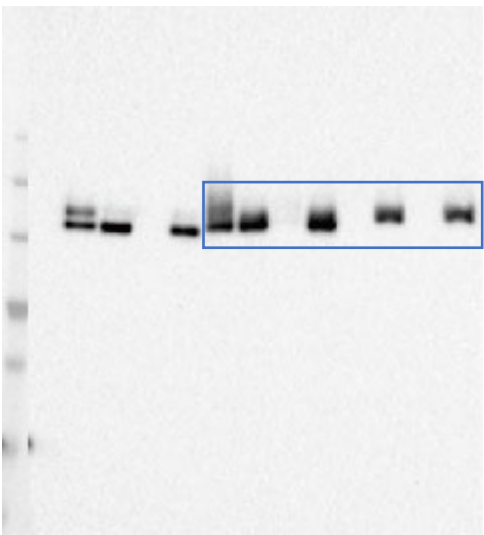

Figure 5d  
top

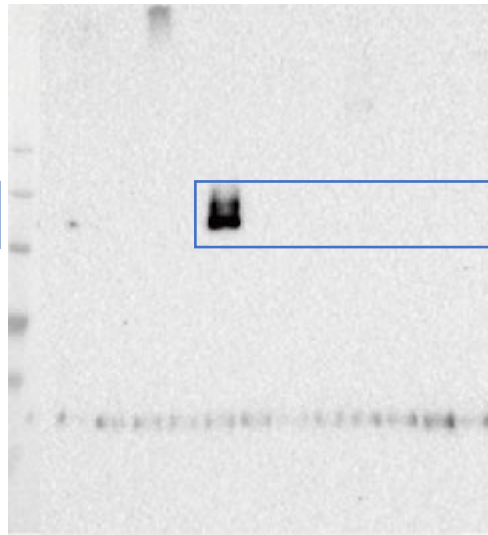

Figure 5d  
middle

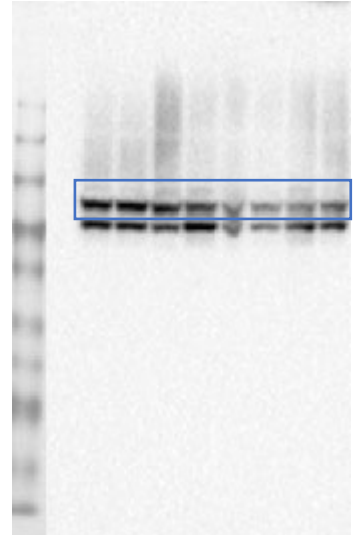

Figure 5d  
bottom
