# Supplementary material for: Beton a prise rapide : de 3 jours a 12 heures?
Source: eLife journal article supplement (doi:10.7554/elife.89002), 2005-09-01
Supplement: fig5-data10 [file elife-89002-fig5-data10-v1.pdf]

**e**

|                          |   |   |   |   |   |   |
|--------------------------|---|---|---|---|---|---|
| HA-Ub                    | + | + | + | + | - | - |
| HA-Ub <sub>NoK</sub>     | - | - | - | - | + | + |
| 3xFLAG                   | - | + | - | - | - | - |
| 3xFLAG-SdcB              | + | - | + | + | + | + |
| GFP                      | + | - | - | - | - | - |
| GFP-MavC                 | - | + | + | - | + | - |
| GFP-MavC <sub>C74A</sub> | - | - | - | + | - | + |

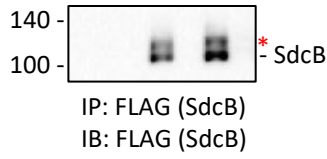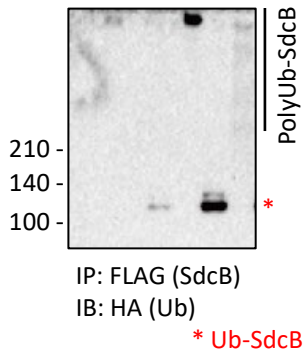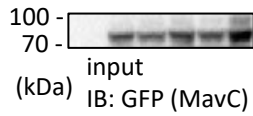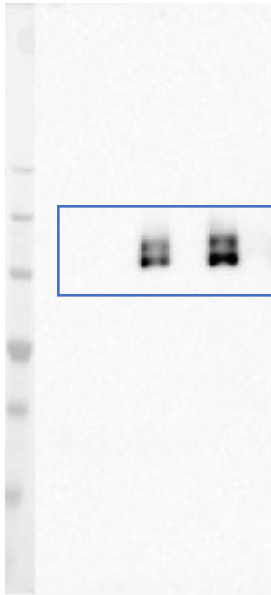

**Figure 5e**  
top

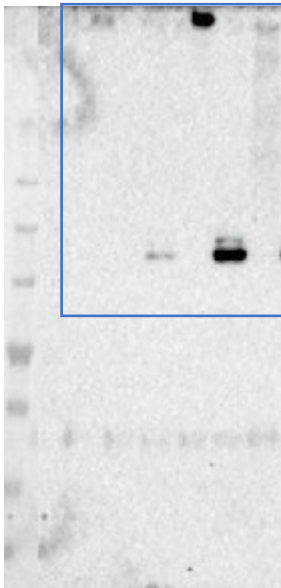

**Figure 5e**  
middle

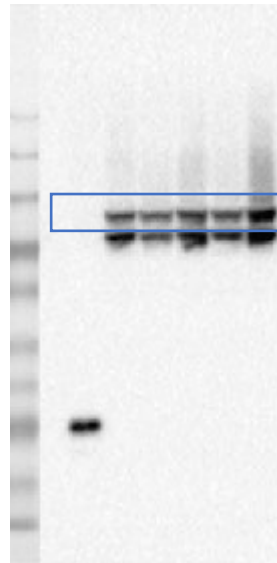

**Figure 5e**  
bottom
