# Supplementary material for: Beton a prise rapide : de 3 jours a 12 heures?
Source: eLife journal article supplement (doi:10.7554/elife.89002), 2005-09-01
Supplement: fig5-data12 [file elife-89002-fig5-data12-v1.pdf]

**f**

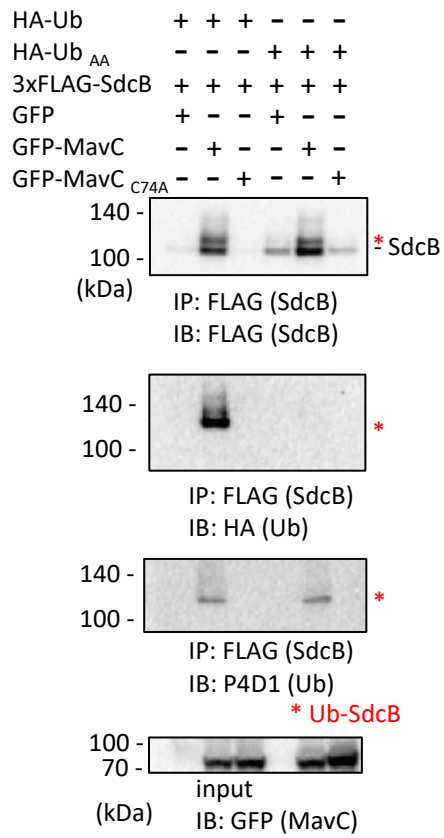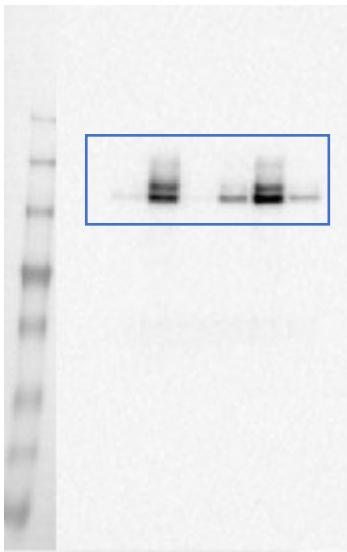

Figure 5f  
top

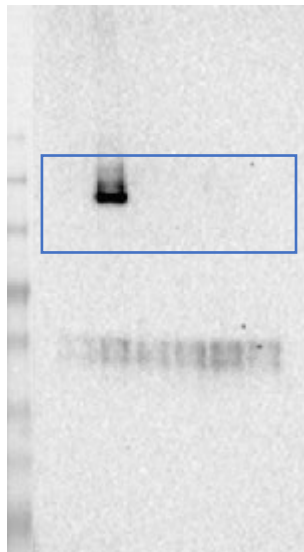

Figure 5f  
2nd

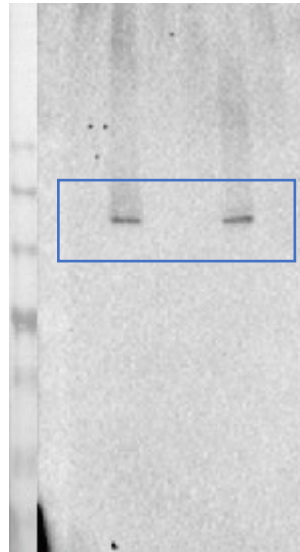

Figure 5f  
3rd

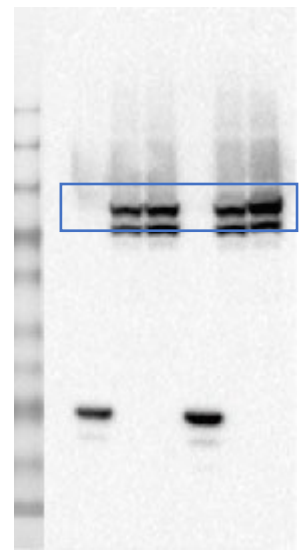

Figure 5f  
bottom
