# Supplementary material for: Beton a prise rapide : de 3 jours a 12 heures?
Source: eLife journal article supplement (doi:10.7554/elife.89002), 2005-09-01
Supplement: fig5-figsupp1-data2 [file elife-89002-fig5-figsupp1-data2-v1.pdf]

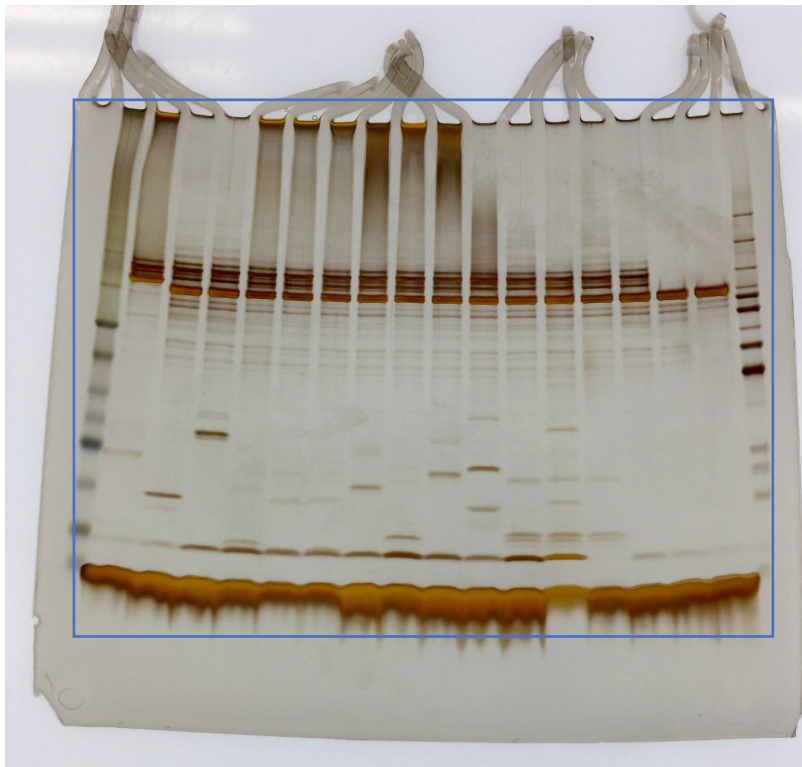

**Figure 5– figure supplement 1a**  
**(silverstaining)**

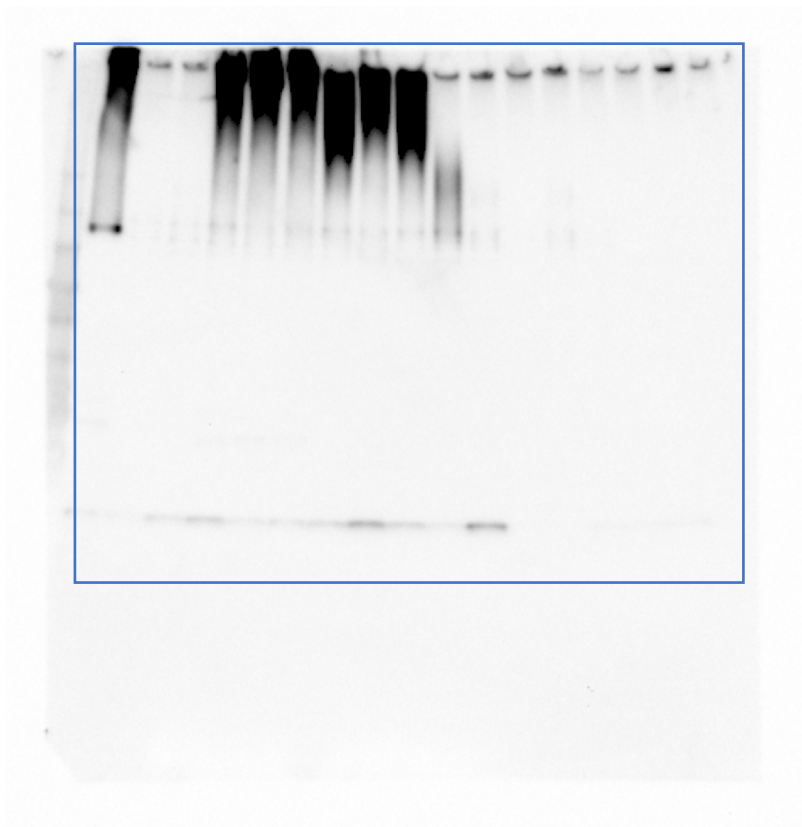

**Figure 5– figure supplement 1b**  
**(anti-FK2)**
