# Supplementary material for: Beton a prise rapide : de 3 jours a 12 heures?
Source: eLife journal article supplement (doi:10.7554/elife.89002), 2005-09-01
Supplement: fig6-data2 [file elife-89002-fig6-data2-v1.pdf]

**a**

|             |   |   |   |   |
|-------------|---|---|---|---|
| 3XFLAG-SdcB | + | + | + | + |
| HA-Ub       | + | + | + | + |
| GFP         | + | - | + | - |
| GFP-MavC    | - | + | - | + |

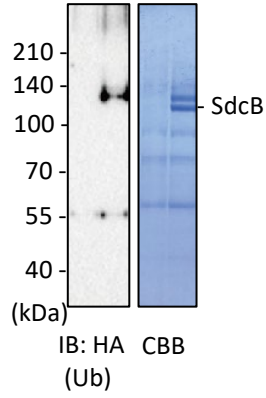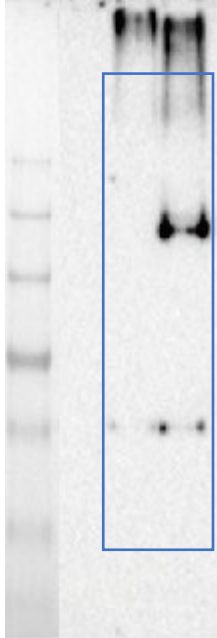

**Figure 6a  
left**

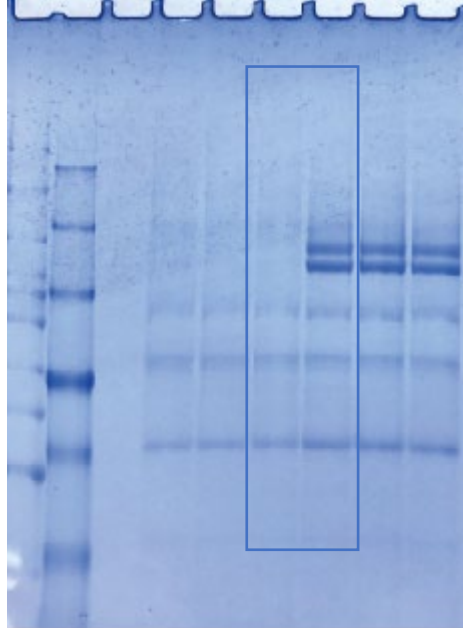

**Figure 6a  
right**
