# Supplementary material for: Multi-tiered actions of Legionella effectors to modulate host Rab10 dynamics
Source: eLife journal article supplement (doi:10.7554/elife.89002), 2023-08-08
Supplement: fig7-data2 [file Figure 7b 221209.xls]

## Sheet: Sheet2
		Rab10-negative	Rab10-positive	Rab10-positive/SdcB-positive (%)			Rab10-negative	Rab10-positive	Rab10-positive/SdcB-positive (%)			Rab10-negative	Rab10-positive	Rab10-positive/SdcB-positive (%)
	HA-MavC p3xFLAG-sdcB/ΔsidCs	185	15	7.5			191	9	4.5			191	5	2.55102
	HA-MavC p3xFLAG-sdcB C57A/ΔsidCs	186	14	7			189	11	5.5			195	5	2.5
	HA-MavC C74A p3xFLAG-sdcB/ΔsidCs	158	42	21			186	61	24.6964			146	57	28.0788
	HA-MavC C74A p3xFLAG-sdcB C57A/ΔsidCs	193	7	3.5			194	6	3			195	5	2.5
		Rab10-positive/SdcB-positive (%)						FTEST	TTEST	FTEST	TTEST
	HA-MavC p3xFLAG-sdcB/ΔsidCs	4.85034	2.49302		7.5	4.5	2.55102	0.915819	0.471327	0.662922	0.000695574
	HA-MavC p3xFLAG-sdcB C57A/ΔsidCs	5	2.29129		7	5.5	2.5			0.590364	0.00064756
	HA-MavC C74A p3xFLAG-sdcB/ΔsidCs	24.5917	3.54057		21	24.6964	28.0788
	HA-MavC C74A p3xFLAG-sdcB C57A/ΔsidCs	3	0.5		3.5	3	2.5	0.0909091	0.106853	0.0391064	0.00393861
