# Supplementary material for: Multi-tiered actions of Legionella effectors to modulate host Rab10 dynamics
Source: eLife journal article supplement (doi:10.7554/elife.89002), 2023-08-08
Supplement: fig7-data2 [file Figure 7c 230406.xls]

## Sheet: Sheet2
		Rab10-negative	Rab10-positive	Rab10-positive (%)			Rab10-negative	Rab10-positive	Rab10-positive (%)			Rab10-negative	Rab10-positive	Rab10-positive (%)
	Lp01	155	45	22.5			172	40	18.8679			170	34	16.6667
	ΔdotA	198	4	1.9802			197	9	4.36893			198	4	1.9802
	Δlpg2149	175	31	15.0485			177	23	11.5			183	28	13.2701
	ΔmavCΔmvcA	139	65	31.8627			162	59	26.6968			147	60	28.9855
		Rab10-positive (%)							TTEST	FTEST
	Lp01	19.3449	2.94577		22.5	18.8679	16.6667		0.0188607	0.532412
	ΔdotA	2.77644	1.37914		1.9802	4.36893	1.9802
	Δlpg2149	13.2729	1.77427		15.0485	11.5	13.2701		0.0004639	0.63929
	ΔmavCΔmvcA	29.1817	2.58854		31.8627	26.6968	28.9855		0.00610365	0.871439
