# Supplementary material for: Beton a prise rapide : de 3 jours a 12 heures?
Source: eLife journal article supplement (doi:10.7554/elife.89002), 2005-09-01
Supplement: fig7-figsupp2-data2 [file elife-89002-fig7-figsupp2-data2-v1.pdf]

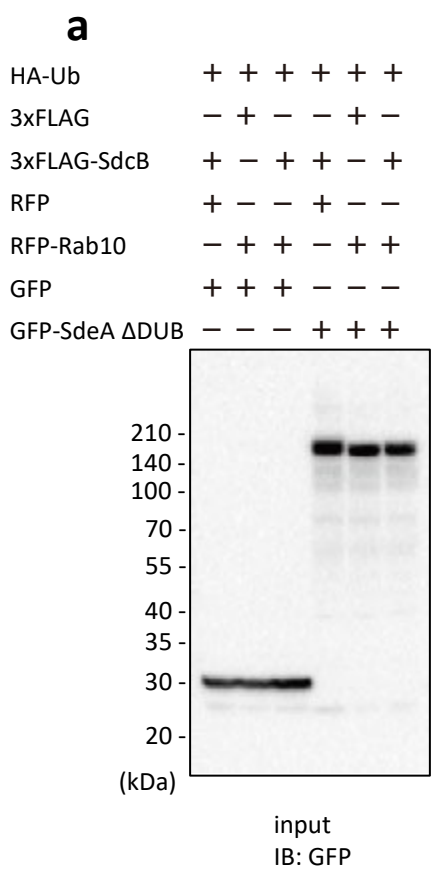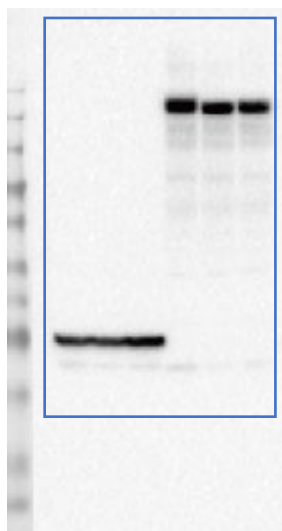

**Figure 7**  
– figure supplement 2a

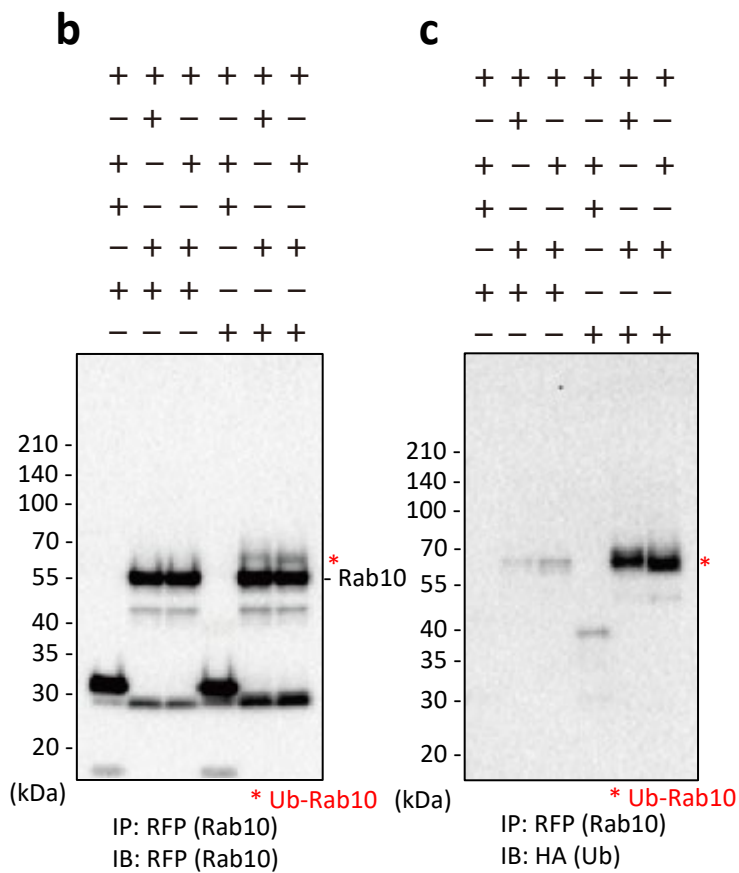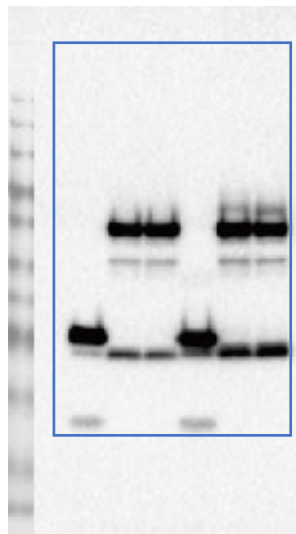

**Figure 7**  
– figure supplement 2b

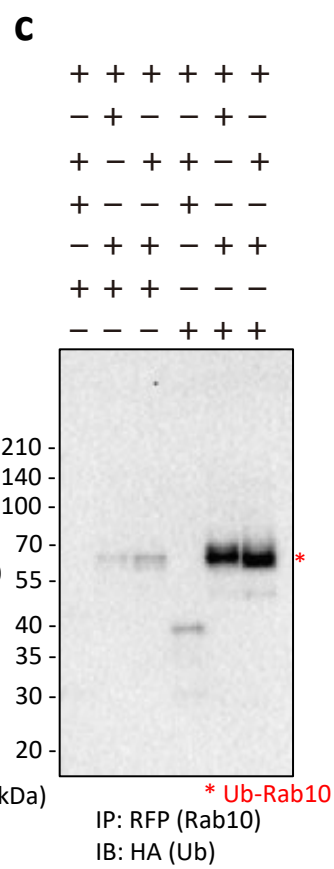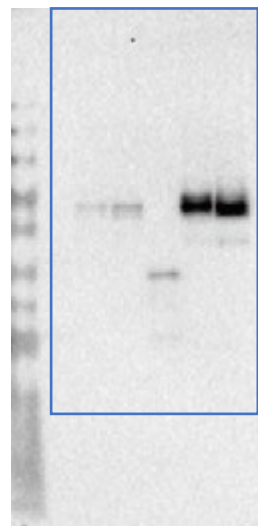

**Figure 7**  
– figure supplement 2c
